# Supplementary material for: Rapid detection of 2-hydroxyglutarate in frozen sections of IDH mutant tumors by MALDI-TOF mass spectrometry
Source: PubMed Central journal article supplement (PMC5834865; doi:10.1186/s40478-018-0523-3), 2018-03-02
Supplement: 40478_2018_523_MOESM1_ESM.pdf [file 40478_2018_523_MOESM1_ESM.pdf]

Table S1

| case number | IDH status | mutation type | m/z     | signal/noise | intensity | TIC       | I/TIC    | concentration [mM] |       | diameter [mm] | diagnosis                        | WHO grade | comments                                                              |
|-------------|------------|---------------|---------|--------------|-----------|-----------|----------|--------------------|-------|---------------|----------------------------------|-----------|-----------------------------------------------------------------------|
|             |            |               |         |              |           |           |          | mean               | stdev |               |                                  |           |                                                                       |
| 1           | wildtype   | n.d.          | 147,028 | 4            | 2016      | 28546798  | 7,06E-05 | 0,205              | 0,01  | 0,8           | Schwannoma                       | I         |                                                                       |
| 2           | wildtype   | n.d.          | 147,032 | 2            | 1186      | 68980951  | 1,72E-05 | 0,199              | 0,01  | 0,5           | Schwannoma                       | I         |                                                                       |
| 3           | wildtype   | IDH1/2 WT     | 147,044 | 5            | 2545      | 38324126  | 6,64E-05 | 0,199              | 0,06  | 5,0           | PA                               | I         |                                                                       |
| 4           | wildtype   | n.d.          | 147,040 | 6            | 3091      | 60155586  | 5,14E-05 | 0,127              | 0,01  | 0,7           | Schwannoma                       | I         |                                                                       |
| 5           | wildtype   | n.d.          | 147,040 | 5            | 2860      | 65314306  | 4,38E-05 | 0,071              | 0,03  | 0,6           | Schwannoma                       | I         |                                                                       |
| 6           | wildtype   | n.d.          | 147,031 | 4            | 2386      | 65452931  | 3,65E-05 | 0,073              | 0,00  | 0,7           | Schwannoma                       | I         |                                                                       |
| 7           | wildtype   | n.d.          | 147,025 | 5            | 2913      | 47863525  | 6,09E-05 | 0,137              | 0,02  | 0,4           | Schwannoma                       | I         |                                                                       |
| 8           | wildtype   | n.d.          | 147,250 | 7            | 3828      | 47380043  | 8,08E-05 | 0,092              | 0,01  | 0,5           | Schwannoma                       | I         |                                                                       |
| 9           | wildtype   | n.d.          | 147,051 | 5            | 3806      | 60897595  | 6,25E-05 | 0,123              | 0,02  | 0,7           | Schwannoma                       | I         |                                                                       |
| 10          | wildtype   | IDH1/2 WT     | 147,027 | n.a          | 943       | 63507992  | 1,48E-05 | -0,124             | 0,09  | 4,0           | CNS-tissue                       | n.d.      | post removal of brain metastasis of NSCLC                             |
| 11          | wildtype   | IDH1/2 WT     | 147,053 | n.a          | 3822      | 77954962  | 4,90E-05 | 0,050              | 0,07  | 4,0           | GBM, IDH-wildtype                | IV        |                                                                       |
| 12          | wildtype   | IDH1/2 WT     | 147,039 | 8            | 5382      | 58334631  | 9,23E-05 | 0,093              | 0,02  | 3,0           | GBM, IDH-wildtype                | IV        |                                                                       |
| 13          | wildtype   | IDH1/2 WT     | 147,044 | 6            | 3028      | 58895052  | 5,14E-05 | -0,014             | 0,13  | 5,0           | GBM, IDH-wildtype                | IV        | recurrent                                                             |
| 14          | wildtype   | IDH1/2 WT     | 147,035 | 2            | 1577      | 55349373  | 2,85E-05 | 0,005              | 0,06  | 5,0           | GBM, IDH-wildtype                | IV        |                                                                       |
| 15          | wildtype   | IDH1/2 WT     | 147,040 | 6            | 3964      | 78153046  | 5,07E-05 | 0,302              | 0,07  | 5,0           | GBM, IDH-wildtype                | IV        |                                                                       |
| 16          | wildtype   | IDH1/2 WT     | 147,037 | 6            | 4260      | 60980504  | 6,99E-05 | 0,152              | 0,13  | 5,0           | GBM, IDH-wildtype                | IV        |                                                                       |
| 17          | wildtype   | IDH1/2 WT     | 147,037 | 4            | 2431      | 55031200  | 4,42E-05 | 0,189              | 0,13  | 10,0          | GBM, IDH-wildtype                | IV        |                                                                       |
| 18          | wildtype   | n.d.          | 147,042 | 3            | 1563      | 52592945  | 2,97E-05 | 0,179              | 0,01  | 0,5           | Schwannoma                       | I         |                                                                       |
| 19          | wildtype   | n.d.          | 147,044 | 4            | 2034      | 53058169  | 3,83E-05 | 0,219              | 0,03  | 0,5           | Schwannoma                       | I         |                                                                       |
| 20          | wildtype   | IDH1/2 WT     | 147,040 | 4            | 1928      | 55785640  | 3,46E-05 | 0,205              | 0,02  | 0,8           | GBM, IDH-wildtype                | IV        | recurrent                                                             |
| 21          | wildtype   | n.d.          | 147,049 | 6            | 4806      | 103763061 | 4,63E-05 | 0,138              | 0,01  | 1,5           | Schwannoma                       | I         |                                                                       |
| 22          | wildtype   | IDH1/2 WT     | 147,048 | 2            | 2233      | 81158333  | 2,75E-05 | 0,196              | 0,02  | 0,6           | GBM, IDH-wildtype                | IV        |                                                                       |
| 23          | wildtype   | IDH1/2 WT     | 147,039 | n.a          | 558       | 91891355  | 6,07E-06 | 0,381              | 0,02  | 0,5           | GBM, IDH-wildtype                | IV        |                                                                       |
| 24          | wildtype   | n.d.          | 147,047 | 5            | 4811      | 60624503  | 7,94E-05 | 0,186              | 0,01  | 8,0           | mamma carcinoma                  | n.d.      | brain metastasis                                                      |
| 25          | wildtype   | IDH1/2 WT     | 147,051 | 6            | 6963      | 79431637  | 8,77E-05 | 0,166              | 0,01  | 4,0           | Ganglioglioma                    | I         |                                                                       |
| 26          | wildtype   | IDH1/2 WT     | 147,044 | 3            | 1947      | 49104572  | 3,97E-05 | -0,032             | 0,12  | 3,0           | GBM, IDH-wildtype                | IV        |                                                                       |
| 27          | wildtype   | n.d.          | 147,028 | 4            | 1791      | 25277191  | 7,09E-05 | 0,245              | 0,01  | 1,0           | Schwannoma                       | I         |                                                                       |
| 28          | wildtype   | n.d.          | 147,028 | 4            | 2144      | 32752104  | 6,55E-05 | 0,133              | 0,01  | 0,8           | Schwannoma                       | I         |                                                                       |
| IDH WT      | wildtype   | IDH1/2 WT     | n.a     | n.a          | n.a       | n.a       | n.a      | n.a                | n.a   | 3,0           | CNS-tissue with reactive changes | n.d.      | post removal of brain metastasis of NSCLC; used as IDH WT test tissue |
| 29          | mutant     | IDH1 R132C    | 147,022 | 36           | 40512     | 135854699 | 2,98E-04 | 1,835              | 0,05  | 3,0           | DA, IDH-mutant                   | II        |                                                                       |
| 30          | mutant     | IDH1 R132S    | 147,022 | 15           | 12114     | 43109658  | 2,81E-04 | 1,861              | 0,08  | 3,0           | GBM, IDH-mutant                  | IV        |                                                                       |
| 31          | mutant     | IDH1 R132H    | 147,030 | 20           | 18201     | 66766186  | 2,73E-04 | 0,929              | 0,03  | 5,0           | DA, IDH-mutant                   | II        |                                                                       |
| 32          | mutant     | IDH1 R132H    | 147,024 | 155          | 114446    | 81108146  | 1,41E-03 | 8,248              | 0,09  | 7,0           | O, IDH-mutant                    | II        |                                                                       |
| 33          | mutant     | IDH1 R132H    | 147,025 | 27           | 23149     | 51931875  | 4,46E-04 | 2,483              | 0,05  | 4,0           | DA, IDH-mutant                   | II        |                                                                       |
| 34          | mutant     | IDH2 R172S    | 147,045 | 105          | 100791    | 82013716  | 1,23E-03 | 10,888             | 0,07  | 2,0           | AA, IDH-mutant                   | III       |                                                                       |
| 35          | mutant     | IDH2 R172K    | 147,026 | 176          | 108533    | 62437245  | 1,74E-03 | 10,327             | 0,28  | 4,0           | O, IDH-mutant                    | II        |                                                                       |
| 36          | mutant     | IDH1 R132H    | 147,019 | 96           | 63516     | 55198583  | 1,15E-03 | 6,030              | 0,01  | 3,5           | AO, IDH-mutant                   | III       |                                                                       |
| 37          | mutant     | IDH1 R132G    | 147,033 | 73           | 49540     | 77233864  | 6,41E-04 | 5,916              | 0,01  | 3,5           | DA, IDH-mutant                   | II        |                                                                       |
| 38          | mutant     | IDH1 R132H    | 147,052 | 59           | 37592     | 74163194  | 5,07E-04 | 6,085              | 0,48  | 2,5           | DA, IDH-mutant                   | II        |                                                                       |
| 39          | mutant     | IDH1 R132H    | 147,035 | 37           | 31468     | 82834763  | 3,80E-04 | 0,836              | 0,04  | 4,0           | DA, IDH-mutant                   | II        |                                                                       |
| 40          | mutant     | IDH1 R132H    | 147,023 | 40           | 30460     | 97772018  | 3,12E-04 | 1,700              | 0,10  | 3,5           | DA, IDH-mutant                   | II        |                                                                       |
| 41          | mutant     | IDH1 R132H    | 147,043 | 20           | 15069     | 77395588  | 1,95E-04 | 0,822              | 0,03  | 3,0           | AA, IDH-mutant                   | III       |                                                                       |
| 42          | mutant     | IDH1 R132H    | 147,025 | 25           | 20651     | 77395588  | 2,67E-04 | 2,076              | 0,11  | 4,0           | O, IDH-mutant                    | II        |                                                                       |
| 43          | mutant     | IDH1 R132H    | 147,042 | 42           | 21363     | 47273930  | 4,52E-04 | 5,625              | 0,10  | 4,0           | AA, IDH-mutant                   | III       |                                                                       |
| 44          | mutant     | IDH1 R132H    | 147,012 | 78           | 44614     | 40859217  | 1,09E-03 | 8,211              | 0,07  | 6,0           | DA, IDH-mutant                   | II        |                                                                       |
| 45          | mutant     | IDH1 R132H    | 147,017 | 34           | 19733     | 44756867  | 4,41E-04 | 3,956              | 0,00  | 3,0           | AA, IDH-mutant                   | III       |                                                                       |
| 46          | mutant     | IDH1 R132H    | 147,011 | 136          | 95951     | 47218496  | 2,03E-03 | 6,513              | 0,06  | 6,0           | DA, IDH-mutant                   | II        |                                                                       |
| 47          | mutant     | IDH2 R172K    | 147,017 | 244          | 160500    | 39765170  | 4,04E-03 | 7,718              | 0,03  | 3,5           | DA, IDH-mutant                   | II        |                                                                       |
| 48          | mutant     | IDH2 R172M    | 147,017 | 212          | 80931     | 16499557  | 4,91E-03 | 7,067              | 0,10  | 3,5           | O, IDH-mutant                    | II        |                                                                       |
| 49          | mutant     | IDH1 R132H    | 147,029 | 39           | 18018     | 53399393  | 3,37E-04 | 3,781              | 0,03  | 3,0           | DA, IDH-mutant                   | II        |                                                                       |
| 50          | mutant     | IDH1 R132H    | 147,021 | 34           | 23379     | 70721892  | 3,31E-04 | 5,263              | 0,20  | 2,0           | AO, IDH-mutant                   | III       |                                                                       |
| 51          | mutant     | IDH1 R132H    | 147,035 | 31           | 22517     | 72943304  | 3,09E-04 | 5,129              | 0,01  | 3,0           | O, IDH-mutant                    | II        |                                                                       |
| 52          | mutant     | IDH1 R132H    | 147,024 | 29           | 18186     | 39943127  | 4,55E-04 | 1,502              | 0,08  | 5,0           | AO, IDH-mutant                   | III       |                                                                       |
| 53          | mutant     | IDH1 R132H    | 147,035 | 21           | 12071     | 45173193  | 2,67E-04 | 0,839              | 0,07  | 2,0           | O, IDH-mutant                    | II        |                                                                       |
| 54          | mutant     | IDH1 R132H    | 147,043 | 41           | 52076     | 10454407  | 4,98E-03 | 2,974              | 0,15  | 3,0           | O, IDH-mutant                    | II        |                                                                       |
| IDH mutant  | mutant     | IDH1 R132H    | n.a     | n.a          | n.a       | n.a       | n.a      | n.a                | n.a   | 4,0           | DA, IDH-mutant                   | II        | used as IDH mutant test tissue                                        |
