# Supplementary material for: Rapid detection of 2-hydroxyglutarate in frozen sections of IDH mutant tumors by MALDI-TOF mass spectrometry
Source: PubMed Central journal article supplement (PMC5834865; doi:10.1186/s40478-018-0523-3), 2018-03-02

# Figure S1

**a**

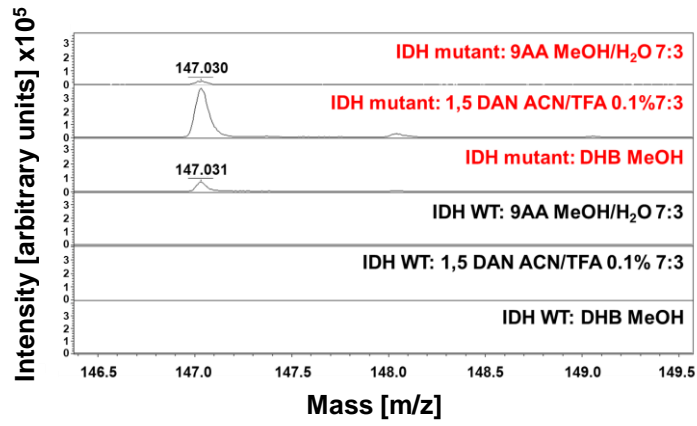

**b**

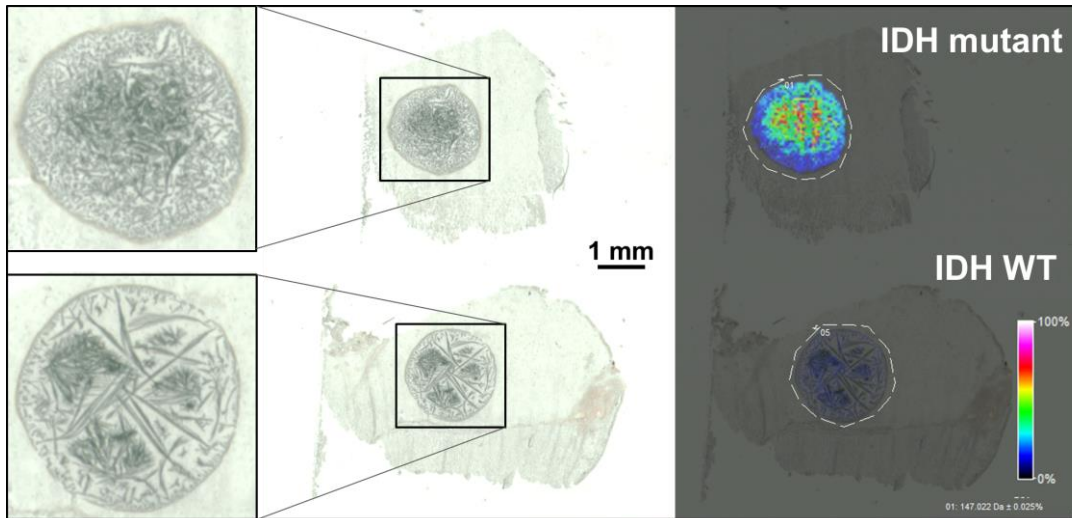

Supplement: 40478_2018_523_MOESM2_ESM.pdf [file 40478_2018_523_MOESM2_ESM.pdf]
